# Supplementary material for: Impact of high-risk disease on the efficacy of chimeric antigen receptor T-cell therapy for multiple myeloma: a meta-analysis of 723 patients
Source: PubMed Central journal article supplement — Haematologica. 2023 Feb 23;108(10):2799–802. doi: 10.3324/haematol.2022.282510 (PMC10542827; doi:10.3324/haematol.2022.282510), 2023-02-23
Supplement: 2022_282510_GAGELMANN_SUPPL.pdf [file 2022_282510_GAGELMANN_SUPPL.pdf]

# Impact of high-risk disease on the efficacy of chimeric antigen receptor T-cell therapy for multiple myeloma: a meta-analysis of 723 patients

Nico Gagelmann, Francis A. Ayuk, Evgeny Klyuchnikov, Christine Wolschke, Susanna Carolina Berger and Nicolaus Kröger

Department of Stem Cell Transplantation, University Medical Center Hamburg-Eppendorf, Hamburg, Germany

Correspondence:

N. KRÖGER - [nkroeger@uke.de](mailto:nkroeger@uke.de)

<https://doi.org/10.3324/haematol.2022.282510>

**Figure S1. PRISMA flow diagram of study selection and meta-analysis.**

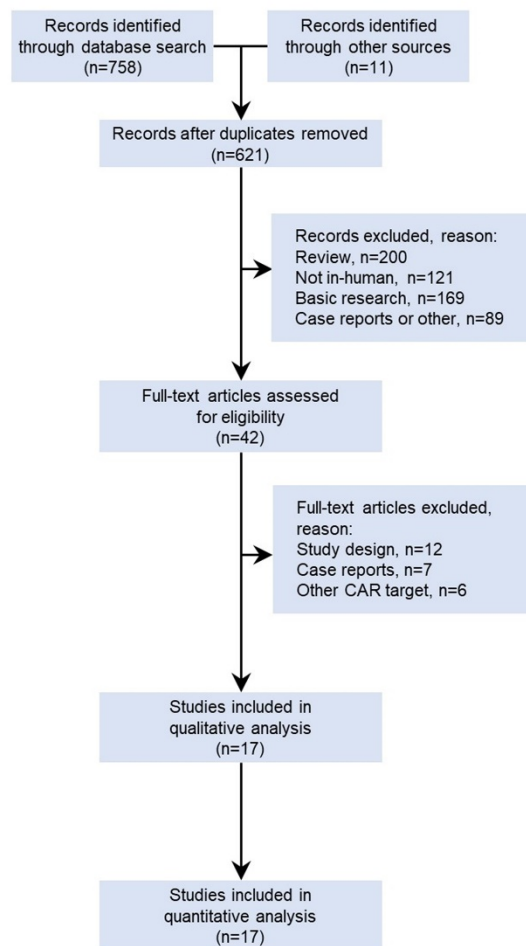

**A. Meta-analysis for measurable residual disease in patients with or without extramedullary disease.**

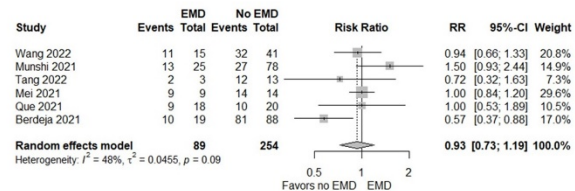

**B. Meta-analysis for overall survival in patients with or without extramedullary disease.**

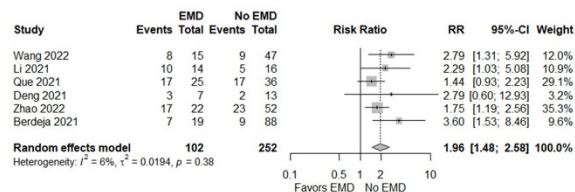

**C. Meta-analysis for measurable residual disease in patients with high-risk or standard-risk cytogenetics.**

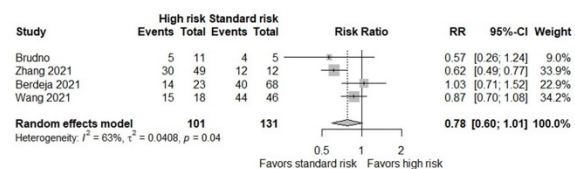

**D. Meta-analysis for overall survival in patients with high-risk or standard-risk cytogenetics.**

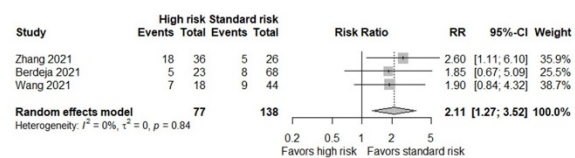

**Table S1. Characteristics of included studies.**

| Study        | Country    | N   | Median age | Lines of Prior treatment | ASCT before CAR-T | LD                                                                      | Antigen       | Follow-up, months | Reference                                                                                                                                                                                                                                                                                   |
|--------------|------------|-----|------------|--------------------------|-------------------|-------------------------------------------------------------------------|---------------|-------------------|---------------------------------------------------------------------------------------------------------------------------------------------------------------------------------------------------------------------------------------------------------------------------------------------|
| Brudno 2018  | US         | 26  | (18-70)    | 10                       | 85%               | Flu/Cy: 30mg/m <sup>2</sup> /300mg/m <sup>2</sup> daily on day -5 to -3 | BCMA          | 5                 | Brudno JN, Maric I, Hartman SD, et al. T Cells Genetically Modified to Express an Anti-B-Cell Maturation Antigen Chimeric Antigen Receptor Cause Remissions of Poor-Prognosis Relapsed Multiple Myeloma. <i>J Clin Oncol</i> 2018;36:2267–80.                                               |
| Tang 2022    | China      | 16  | 57         | 3                        | 20%               | Flu/Cy: 25mg/m <sup>2</sup> and 250mg/m <sup>2</sup> days -4 to -2      | BCMA and CD38 | 12                | Tang Y, Yin H, Zhao X, et al. High efficacy and safety of CD38 and BCMA bispecific CAR-T in relapsed or refractory multiple myeloma. <i>J Exp Clin Cancer Res</i> 2022;41:2.                                                                                                                |
| Mei 2021     | China      | 23  | 59         | 4                        | 13%               | Flu/Cy: 25mg/m <sup>2</sup> and 250mg/m <sup>2</sup> days -5 to -3      | BCMA and CD38 | 9                 | Mei H, Li C, Jiang H, et al. A bispecific CAR-T cell therapy targeting BCMA and CD38 in relapsed or refractory multiple myeloma. <i>J Hematol Oncol</i> 2021;14:161.                                                                                                                        |
| Berdeja 2021 | US, Europe | 113 | 61         | 6                        | 90%               | Flu/Cy: 30mg/m <sup>2</sup> and 300mg/m <sup>2</sup> for 3 days         | BCMA          | 12                | Berdeja JG, Madduri D, Usmani SZ, et al. Ciltacabtagene autoleucel, a B-cell maturation antigen-directed chimeric antigen receptor T-cell therapy in patients with relapsed or refractory multiple myeloma (CARTITUDE-1): a phase 1b/2 open-label study. <i>The Lancet</i> 2021;398:314–24. |
| Shi 2021     | China      | 10  | 54         | NA                       | 100%              | NA                                                                      | BCMA          | 42                | Shi X, Yan L, Shang J, et al. Anti-CD19 and anti-BCMA CAR T cell therapy followed by lenalidomide maintenance after autologous stem-cell transplantation for high-risk newly diagnosed multiple myeloma. <i>Am J Hematol</i> 2022;97:537–47.                                                |
| Li 2021      | China      | 28  | 55         | 4                        | 37%               | Flu/Cy: 25mg/m <sup>2</sup> and 20mg/kg days -4 to -2                   | BCMA          | 13                | Li C, Cao W, Que Y, et al. A phase I study of anti-BCMA CAR T cell therapy in relapsed/refractory multiple myeloma and plasma cell leukemia. <i>Clin Transl Med</i> 2021;11:e346.                                                                                                           |
| Munshi 2021  | US, Europe | 128 | 61         | 6                        | 94%               | Flu/Cy: 30mg/m <sup>2</sup> and 300mg/m <sup>2</sup> days -5 to -3      | BCMA          | 13                | Munshi NC, Anderson LD, Shah N, et al. Idecabtagene Vicleucel in Relapsed and Refractory Multiple Myeloma. <i>N Engl J Med</i> 2021;384:705–16.                                                                                                                                             |
| Deng 2021    | China      | 13  | 58         | 9                        | 33%               | Flu/Cy: 30mg/m <sup>2</sup> and 400mg/m <sup>2</sup> days -4 to -2      | BCMA          | 10                | Deng H, Liu M, Yuan T, et al. Efficacy of Humanized Anti-BCMA CAR T Cell Therapy in Relapsed/Refractory Multiple Myeloma Patients With and Without Extramedullary Disease. <i>Front Immunol</i> 2021;12:720571.                                                                             |
| Du 2021      | China      | 49  | 57         | 4                        | 29%               | Flu/Cy: 30mg/m <sup>2</sup> and 300mg/m <sup>2</sup> days -4 to -2      | BCMA          | 15                | Du J, Wei R, Jiang S, et al. CAR-T cell therapy targeting B cell maturation antigen is effective for relapsed/refractory multiple myeloma, including cases with poor performance status. <i>Am J Hematol</i> 2022;97:933–41.                                                                |
| Cohen 2019   | US         | 25  | 58         | 7                        | 92%               | Cy: 1.5g/m <sup>2</sup> or no LD                                        | BCMA          | 13                | Cohen AD, Garfall AL, Stadtmauer EA, et al. B cell maturation antigen-specific CAR T cells are clinically active in multiple myeloma. <i>J Clin Invest</i> 2019;129:2210–21.                                                                                                                |
| Garfall 2018 | US         | 10  | 61         | 6                        | 100%              | Melphalan: 140-200 mg/m <sup>2</sup>                                    | CD19          | 5                 | Garfall AL, Stadtmauer EA, Hwang W-T, et al. Anti-CD19 CAR T cells with high-dose melphalan and autologous stem cell transplantation for refractory multiple myeloma. <i>JCI Insight</i> 2018;3.                                                                                            |
| Zhao 2021    | China      | 74  | 54         | 3                        | 24%               | Flu/Cy: 30mg/m <sup>2</sup> and 300mg/m <sup>2</sup> days -5 to -3      | BCMA          | 24                | Zhao W-H, Wang B-Y, Chen L-J, et al. Four-year follow-up of LCAR-B38M in relapsed or refractory multiple myeloma: a phase 1, single-arm, open-label, multicenter study in China (LEGEND-2). <i>J Hematol Oncol</i> 2022;15:86.                                                              |

|            |       |    |    |   |     |                                                                               |               |    |                                                                                                                                                                                                                                            |
|------------|-------|----|----|---|-----|-------------------------------------------------------------------------------|---------------|----|--------------------------------------------------------------------------------------------------------------------------------------------------------------------------------------------------------------------------------------------|
| Que 2021   | China | 61 | 54 | 4 | 33% | Flu/Cy: 25mg/m <sup>2</sup> and 20mg/kg days -4 to -2                         | BCMA          | 28 | Que Y, Xu M, Xu Y, et al. Anti-BCMA CAR-T Cell Therapy in Relapsed/Refractory Multiple Myeloma Patients With Extramedullary Disease: A Single Center Analysis of Two Clinical Trials. <i>Front Immunol</i> 2021;12:755866.                 |
| Wang 2022  | China | 69 | 58 | 4 | 27% | Flu/Cy: 30mg/m <sup>2</sup> for 3 days and 750mg/m <sup>2</sup> for 1 day     | CD19 and BCMA | 21 | Wang Y, Cao J, Gu W, et al. Long-Term Follow-Up of Combination of B-Cell Maturation Antigen and CD19 Chimeric Antigen Receptor T Cells in Multiple Myeloma. <i>J Clin Oncol</i> 2022;40:2246–56.                                           |
| Xu 2019    | China | 17 | 55 | 5 | 47% | Flu/Cy: 25 mg/m <sup>2</sup> and 250 mg/m <sup>2</sup> days -5 to -3          | BCMA          | 15 | Xu J, Chen L-J, Yang S-S, et al. Exploratory trial of a biepitopic CAR T-targeting B cell maturation antigen in relapsed/refractory multiple myeloma. <i>Proc Natl Acad Sci U S A</i> 2019;116:9543–51.                                    |
| Zhang 2021 | China | 61 | 59 | 3 | 39% | Flu 30mg/m <sup>2</sup> days -4 to -2, Cy 500 mg/m <sup>2</sup> days -3 to -2 | BCMA          | 21 | Zhang M, Zhou L, Zhao H, et al. Risk Factors Associated with Durable Progression-Free Survival in Patients with Relapsed or Refractory Multiple Myeloma Treated with Anti-BCMA CAR T-cell Therapy. <i>Clin Cancer Res</i> 2021;27:6384–92. |

**Table S2. Results of heterogeneity across comparisons and outcomes.**

| <b>Outcomes</b>                    | <b>Heterogeneity</b> | <b>P</b> |
|------------------------------------|----------------------|----------|
| <b>Overall response</b>            |                      |          |
| EMD vs no EMD                      | 2%                   | 0.43     |
| High vs standard risk              | 69%                  | <0.01    |
| <b>Measurable residual disease</b> |                      |          |
| EMD vs no EMD                      | 48%                  | 0.09     |
| High vs standard risk              | 63%                  | 0.04     |
| <b>Progression-free survival</b>   |                      |          |
| EMD vs no EMD                      | 0%                   | 0.50     |
| High vs standard risk              | 0%                   | 0.79     |
| <b>Overall survival</b>            |                      |          |
| EMD vs no EMD                      | 6%                   | 0.38     |
| High vs standard risk              | 0%                   | 0.84     |
